# Supplementary material for: Interaction between the Lentil Lipid Transfer Protein Lc-LTP2 and Its Novel Signal Ligand PI(4,5)P2
Source: MDPI journal article supplement (doi:10.3390/membranes10110357), 2020-11-20
Supplement: s1 [file s1]

Supplementary Materials:

## Interaction between the Lentil Lipid Transfer Protein Lc-LTP2 and Its Novel Signal Ligand PI(4,5)P2

Daria Melnikova <sup>1,2</sup>, Ivan Bogdanov <sup>1</sup>, Tatiana Ovchinnikova <sup>1,2,3</sup> and Ekaterina Finkina <sup>1,\*</sup>

<sup>1</sup> Science-Educational Center, M.M. Shemyakin and Yu.A. Ovchinnikov Institute of Bioorganic Chemistry, 117997 Moscow, Russia; [d\\_n\\_m@mail.ru](mailto:d_n_m@mail.ru) (D.M.); [contraton@mail.ru](mailto:contraton@mail.ru) (I.B.); [ovch@bk.ru](mailto:ovch@bk.ru) (T.O.)

<sup>2</sup> Department of Physicochemical Biology and Biotechnology, Moscow Institute of Physics and Technology (State University), 141701 Dolgoprudny, Russia

<sup>3</sup> Department of Bioorganic Chemistry, Lomonosov Moscow State University, 119234 Moscow, Russia

\*Correspondence: [finkina@mail.ru](mailto:finkina@mail.ru); Tel.: +7-495-335-42-00

### Supplementary Figures

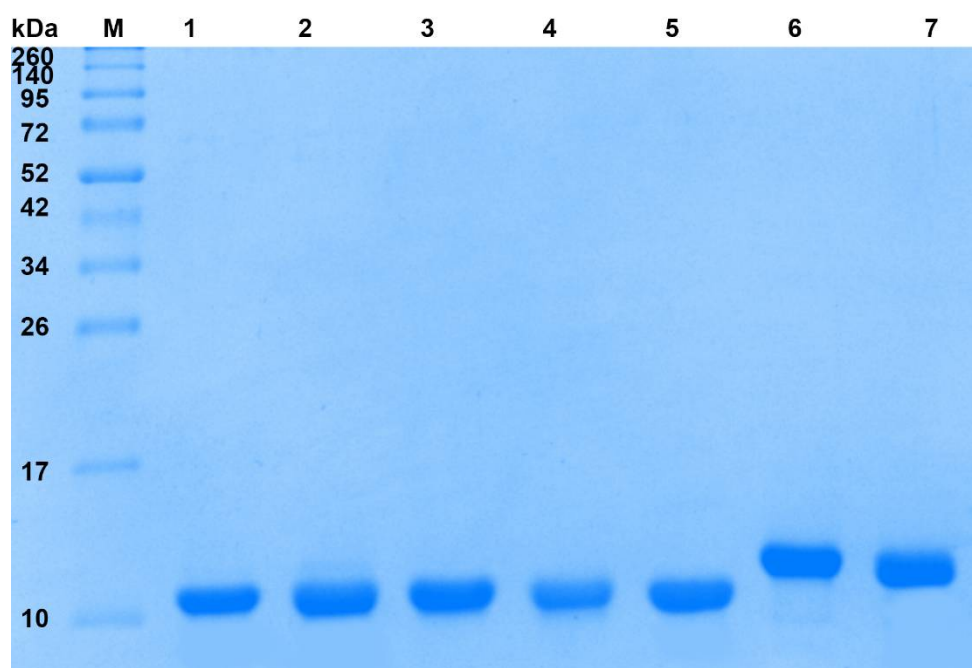

**Figure S1.** SDS-PAGE analysis of purified recombinant proteins was performed as described [10]. M - protein molecular weight marker; 1 - Lc-LTP2; 2 - R45A; 3 - Y80A; 4 - R45A/Y80A; 5 - strawberry LTP; 6 - ragweed LTP; 7 - mugwort LTP.

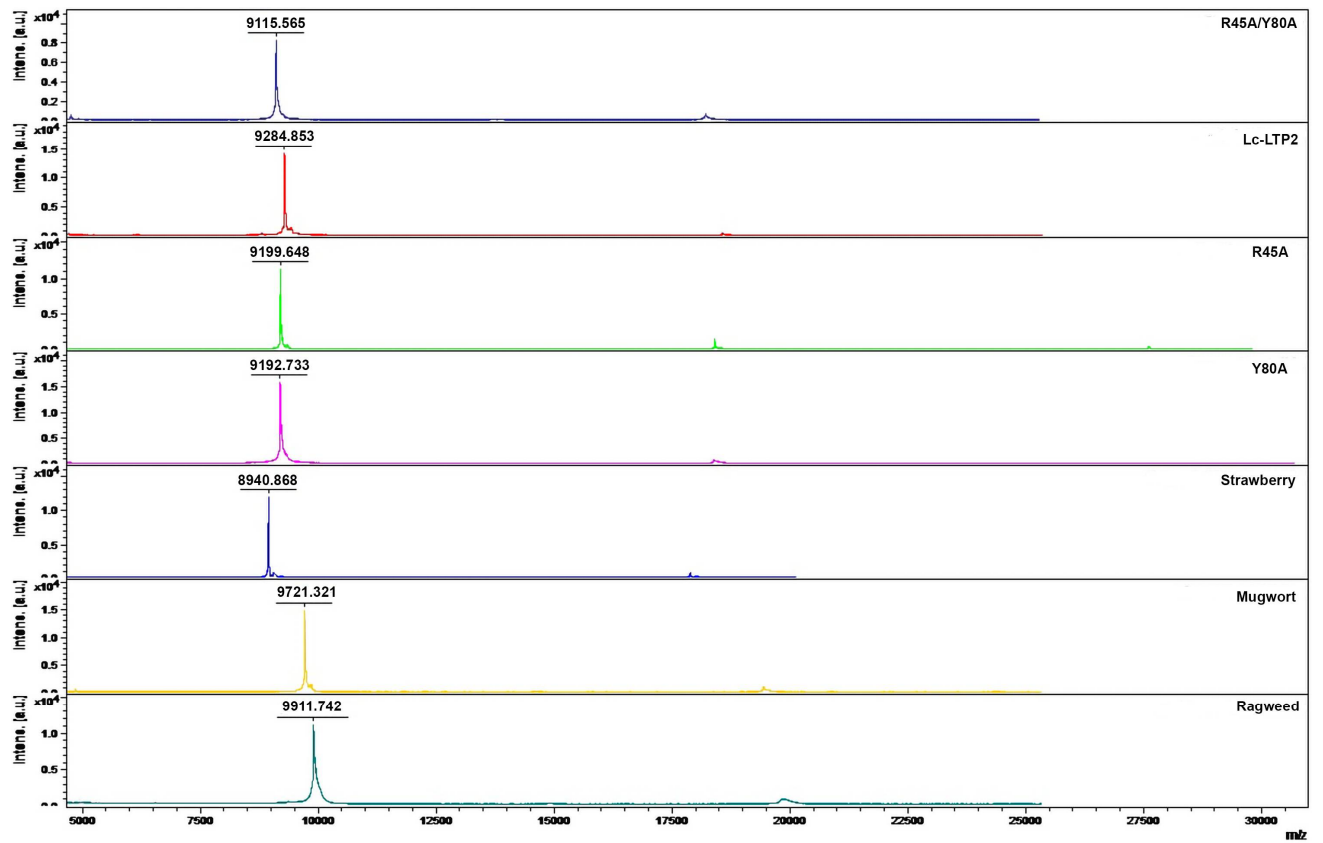

**Figure S2.** MALDI mass spectra of purified recombinant proteins obtained in a linear mode using Ultraflex III MALDI-TOF mass spectrometer (Bruker) equipped with a UV Nd:YAG laser (355 nm) and LIFT MS/MS unit. The measured m/z values correspond to the calculated masses of protonated molecular ions  $[M+H]^+$  of the proteins stabilized by four disulfide bonds.
